# Supplementary material
Source: publisher figshare collection journal article supplement (https://tandf.figshare.com/articles/dataset/_/12089175)
Supplement: Supplementary file 1 [file 1]

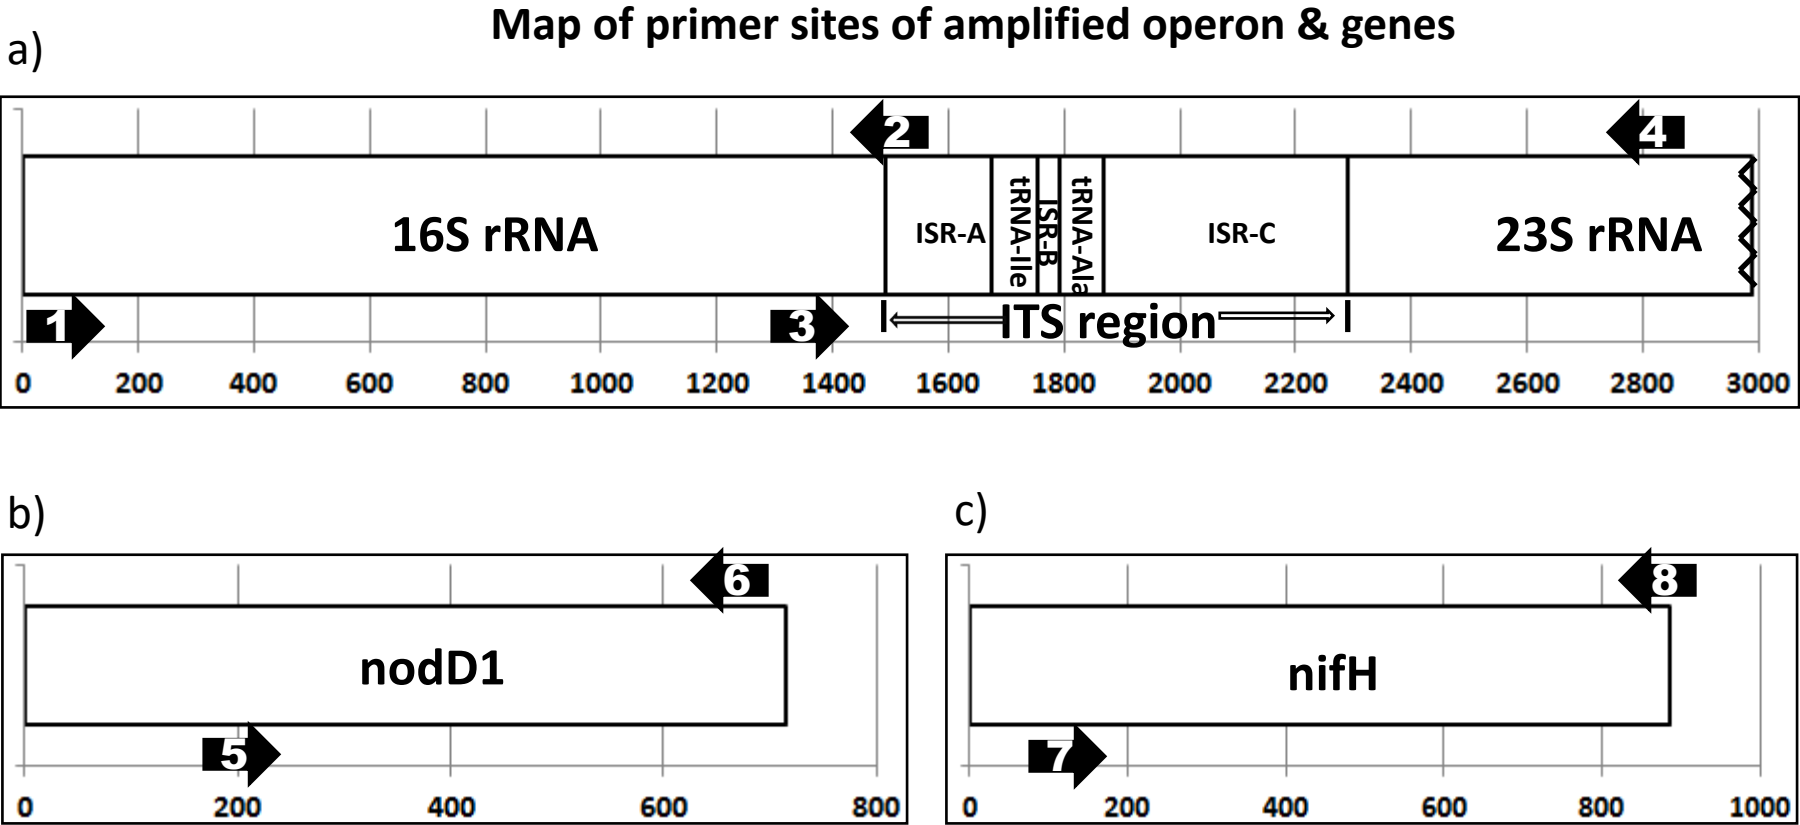

**Fig. S1. A schematic diagram of amplified gene regions of isolates.**

a) Map of primer sites of the 16S–23S rRNA operon. Primer 1 and 2 were used to amplify 16S rRNA region (partial) and, 3 and 4 were used to amplify ITS region (ISR A, tRNA<sup>Ile</sup>, ISR B, tRNA<sup>Ala</sup> & ISR C) and 23S rRNA (partial). ISR-A, ISR-B, and ISR-C are non-coding intergenic spacer regions which surround the tRNA genes for isoleucine (tRNA<sup>Ile</sup>) and alanine (tRNA<sup>Ala</sup>). b) Map of primer sites in the *nodD1* gene, primer 5 & 6 were used to amplify *nodD1* gene. c) Map of primer sites in the *nifH* gene; here primers 7 and 8 were used to amplify *nifH* gene.
