# Supplementary material
Source: publisher figshare collection journal article supplement (https://tandf.figshare.com/articles/dataset/_/12089175)
Supplement: Supplementary file 3 [file 1]

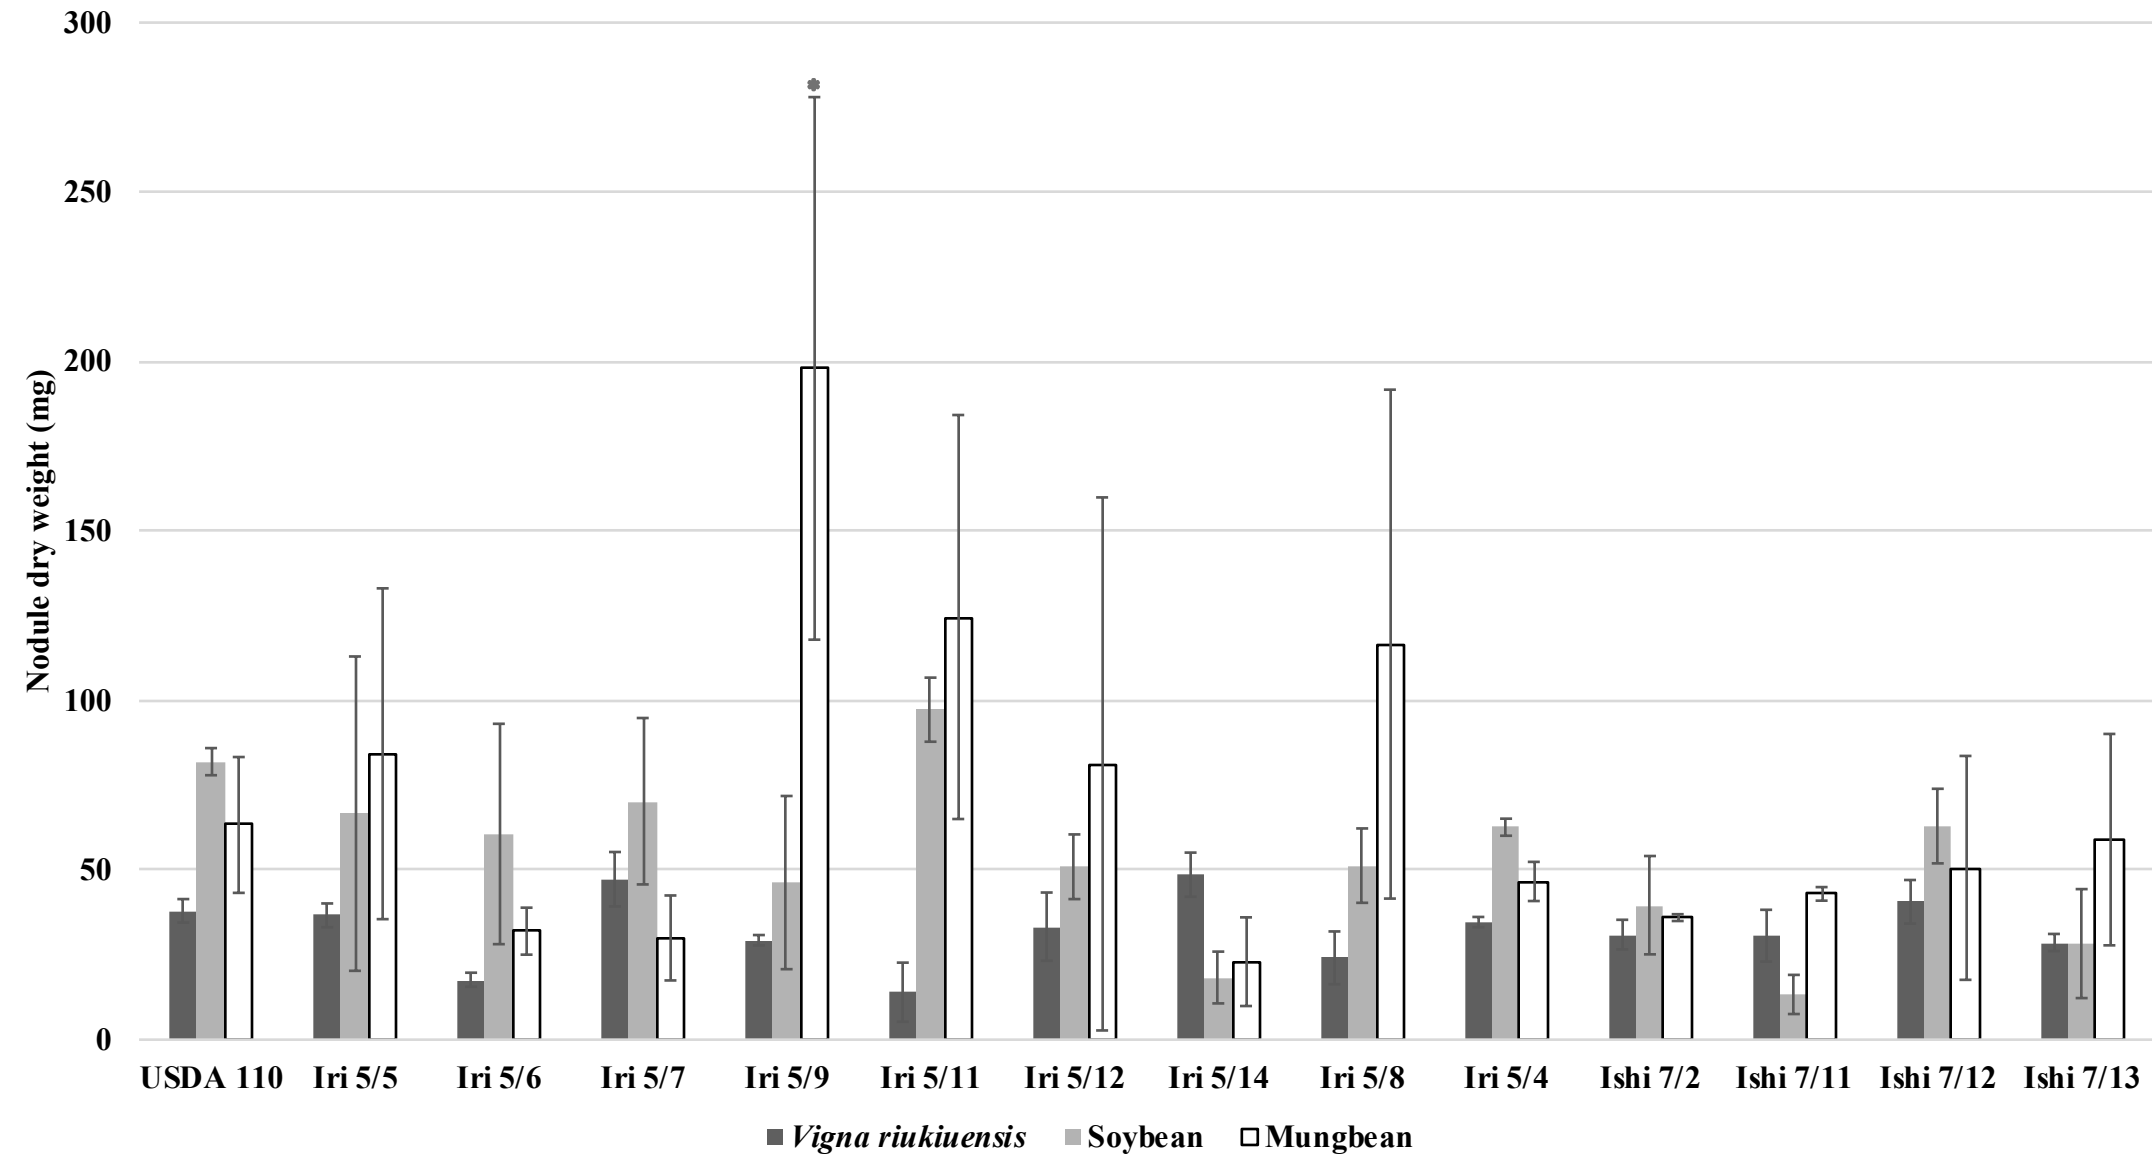

**Fig. S3. Graphical presentation of nodule dry weight of different plants inoculated with bacteria.** USDA110 denotes *B. diazoefficiens* USDA110. Error bars represents standard deviation of triplicate assays. Asterisk symbol denotes significant increase in comparison with *B. diazoefficiens* USDA110 using Dunnett’s test with 95% confidence level.
