# Supplementary material
Source: publisher figshare collection journal article supplement (https://tandf.figshare.com/articles/dataset/_/12089175)
Supplement: Supplementary file 4 [file 1]

Archive with 6 entries (6 files):
- tssp_a_1738192_sm7696.pdf
- tssp_a_1738192_sm7695.pdf
- tssp_a_1738192_sm7694.pdf
- tssp_a_1738192_sm7693.xlsx
- tssp_a_1738192_sm7692.xlsx
- tssp_a_1738192_sm7691.xlsx
