# Supplementary material
Source: publisher figshare collection journal article supplement (https://tandf.figshare.com/articles/dataset/_/12089175)
Supplement: Supplementary file 4 [file 1 › tssp_a_1738192_sm7691.xlsx]

## Sheet: Sheet1
	Table S1. Information of PCR and sequencing primers used in this study.
No.	Name of primers (primer sequences 5’-3’)	Locations (based on the sequence of B. japonicum USDA 6)	Reference
1	1-F (AGTTTGATCCTGGCTC)	1584410-1584425 (11-26 of 16S rRNA)	Chandra et al.
2	3-R (AAGGAGGTGATCCAGCC)	1585888-1585872 (1473-1489 of 16S rRNA)	Chandra et al.
3	ITS 450 (TGYSCACACCGCCCGT)	1585752-1585767 (1337-1352 of 16S rRNA)	van Berkum et al.
4	ITS 1440 (CACGTGTYCCGCCBTACT)	1587173-1587156 (476-493 of 23S rRNA)	van Berkum et al.
5	F11(CGGAATCAGGCTAAAGCCCTGCACAA)	8096179-8096156 (623-648 of nod D)
6	R11(GGTTCGCGAGGCCCTGCTGCACAT)	8095696-8095719 (165-188 of nod D)
7	Nif H-I(AGCATGTCYTCSAGYTCNTCCA)	8325117- 8325138 (77-98 of nif H)	Laguerre et al.
8	Nif H-F( TACGGNAARGGSGGNATCGGCAA)	8325898- 8325876 (836-858 of nif H)	Laguerre et al.
