# Supplementary material
Source: publisher figshare collection journal article supplement (https://tandf.figshare.com/articles/dataset/_/12089175)
Supplement: Supplementary file 4 [file 1 › tssp_a_1738192_sm7692.xlsx]

## Sheet: Sheet1
Table S2. Sequence Pattern length of the 16S–23S ITS Region.
Name of Isolates/Strains	ISR A	tRNAIle	ISR B	tRNAAla	ISR C
Iri 5/5	186	77	33	76	421
Bradyrhizobium japonicum USDA6	186	77	33	76	419
Iri 5/4, 5/6, 5/7, 5/8, 5/12, 5/14	211	77	111	76	397
Bradyrhizobium elkanii UR07	211	77	111	76	398
Iri 5/9, 5/11	212	77	35	76	397
Bradyrhizobium elkanii USDA101	211	77	34	77	386
Ishi 7/2	214	77	116	76	385
Bradyrhizobium elkanii CCBAU05041	204	77	116	76	381
Ishi 7/11, 7/12, 7/13	214	77	35	76	404
Bradyrhizobium jicamae PAC683	205	77	35	76	395
Bradyrhizobium lablabi CCBAU23086	212	77	35	76	396
