# Supplementary material
Source: publisher figshare collection journal article supplement (https://tandf.figshare.com/articles/dataset/_/12089175)
Supplement: Supplementary file 4 [file 1 › tssp_a_1738192_sm7693.xlsx]

## Sheet: Sheet1
Table S3. Similarity (in percentage) of the slow-growing isolates with known species
Isolate name	Origin (Island)	DNA sequence similarity with known species (percentage)
		16S rRNA, ITS, 23S rRNA	nifH	nodD1
Iri 5/5	Iriomote	B. japonicum (99.7%)	B. liaoningense (99%)	B. japonicum (98%)
Iri 5/6	Iriomote	B. elkanii (96.3%)	B. elkanii (97%)	B. elkanii (99%)
Iri 5/7	Iriomote	B. elkanii (96.3%)	B. elkanii (97%)	B. elkanii (99%)
Iri 5/9	Iriomote	B. elkanii (99.3%)	B. elkanii (98%)	B. elkanii (99%)
Iri 5/11	Iriomote	B. elkanii (98.4%)	B. elkanii (97%)	B. elkanii (99%)
Iri 5/12	Iriomote	B. elkanii (96.2%)	B. elkanii (97%)	B. elkanii (99%)
Iri 5/14	Iriomote	B. elkanii (96%)	B. elkanii (97%)	B. elkanii (98%)
Iri 5/8	Iriomote	B. elkanii (96.3%)	B. elkanii (97%)	B. elkanii (99%)
Iri 5/4	Iriomote	B. elkanii (96.3%)	B. elkanii (97%)	B. elkanii (99%)
Ishi 7/2	Ishigaki	B. jicamae (99%) †,	B. liaoningense (99%)	B. icense (94%)
		B. canariense (93%)
Ishi 7/11	Ishigaki	B. jicamae (99%) †,	B. lablabi (99%)	B. icense (94%)
		B. icense (95.7%)
Ishi 7/12	Ishigaki	B. jicamae (99%) †,	B. lablabi (99%)	B. icense (94%)
		B. icense (95%)
Ishi 7/13	Ishigaki	B. jicamae (99%) †,	B. lablabi (99%)	B. icense (94%)
		B. icense (95.7%)
†Available 23S rRNA data was very short in Genbank
