# Supplementary material
Source: publisher figshare collection journal article supplement (https://tandf.figshare.com/articles/dataset/_/12089175)

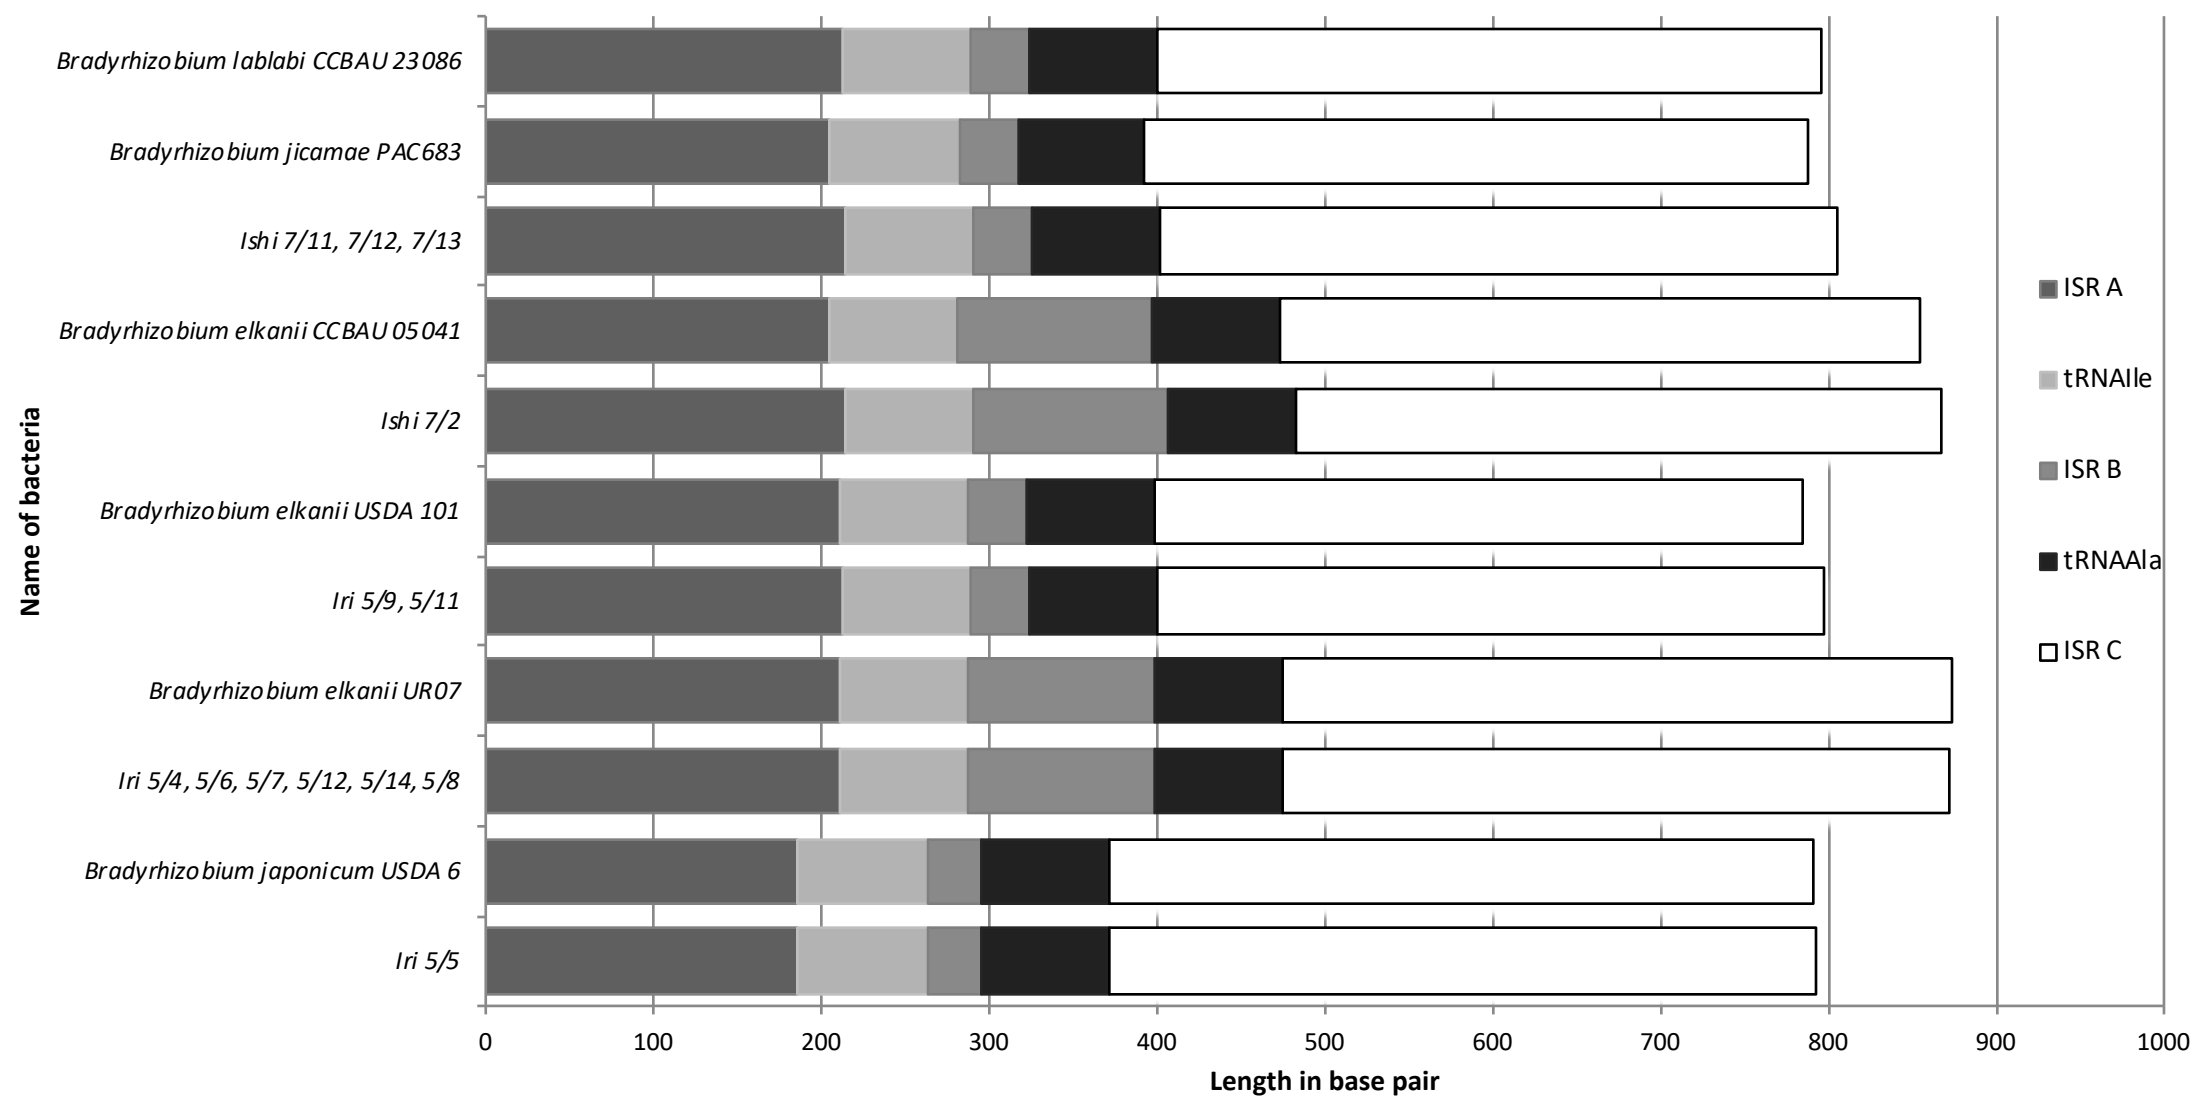

**Fig. S2. Graphical presentation of ITS sequence pattern.**

Supplement: Supplementary file 2 [file 1]
